# Supplementary material
Source: Springer Nature journal article supplement (https://www.springermedizin.de/resource/supplementary/13037_2010_89_MOESM1_ESM.pdf/9659348)
Supplement: MOESM1 [file 9659348]

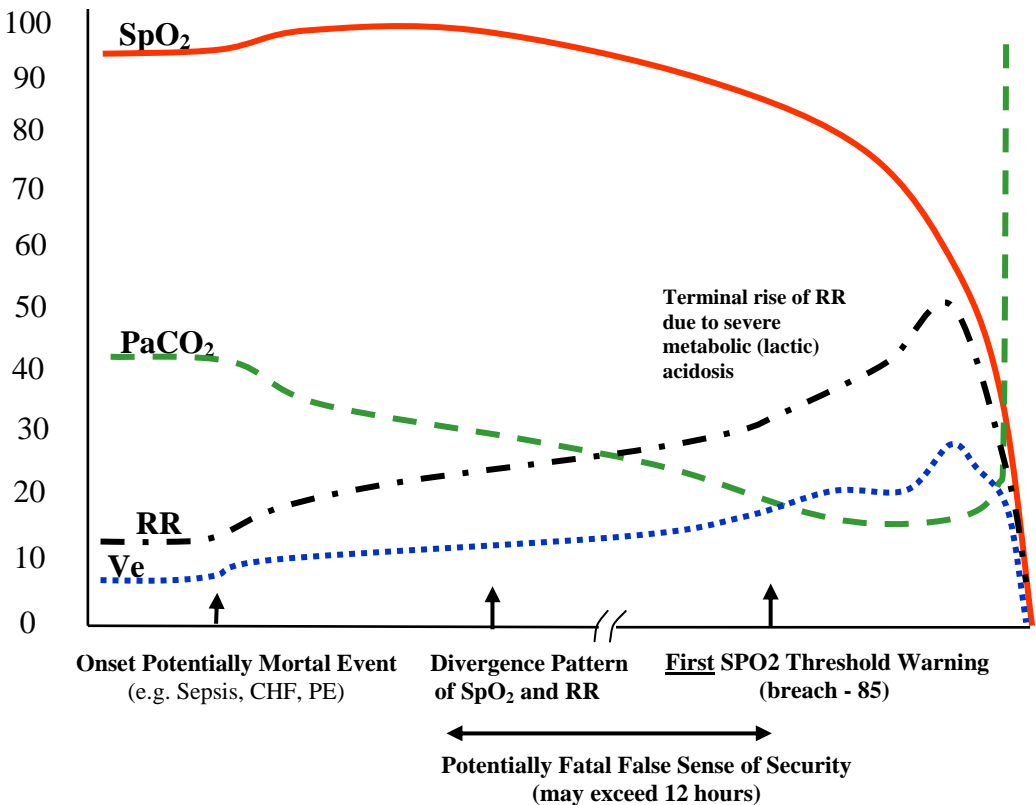

SpO<sub>2</sub>: oxygen saturation; PaCO<sub>2</sub>: Arterial carbon dioxide tension; PACO<sub>2</sub>: Alveolar carbon dioxide tension; P-50: Oxygen tension where hemoglobin is 50% saturated; Ve: minute ventilation, RR: respiratory rate
